# Supplementary material for: Reliable resistive switching memory based on oxygen-vacancy-controlled bilayer structures
Source: Royal Society of Chemistry journal article supplement (doi:10.1039/c6ra00798h), 2016-01-01
Supplement: c6ra00798h1.pdf [file c6ra00798h1.pdf]

## Supplementary Information for

# Reliable resistive switching memory based on oxygen-vacancy-controlled bilayer structures

Kyuhyun Park and Jang-Sik Lee\*

Department of Materials Science and Engineering, Pohang University of Science and Technology (POSTECH), Pohang 790–784, Korea

\*E-mail: jangsik@postech.ac.kr

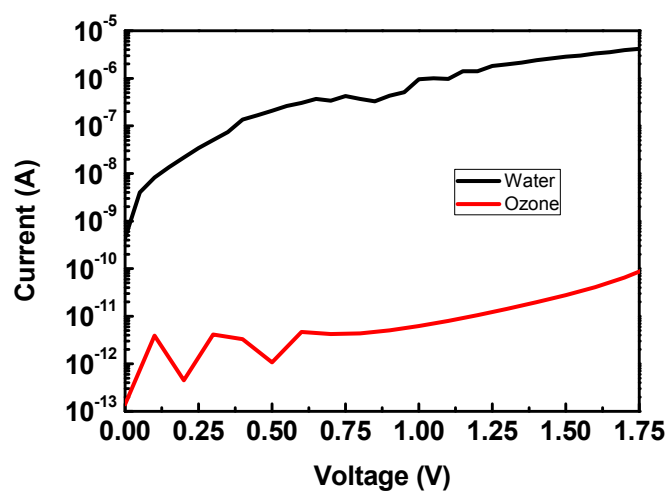

**Fig. S1.** Comparison of initial states of RRAM devices with a single layer of AlO<sub>x</sub> using different oxidizers.

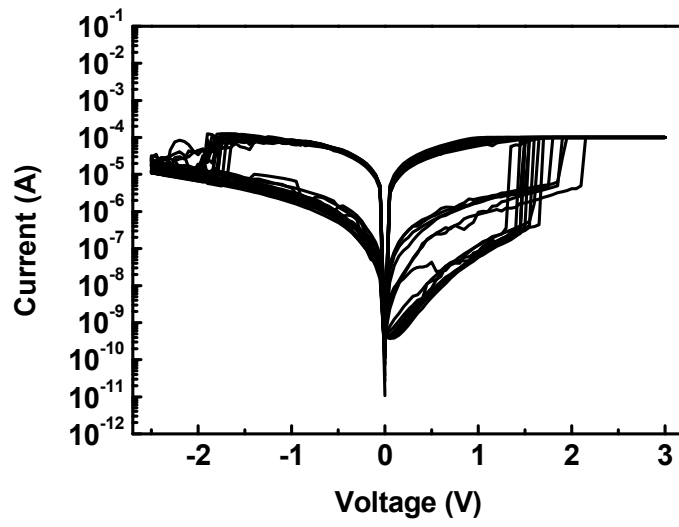

**Fig. S2.** Resistive switching behavior of single-layer RRAM device with  $\text{AlO}_x$  (water).
